# Supplementary material for: Norepinephrine links astrocytic activity to regulation of cortical state
Source: PubMed Central journal article supplement (PMC10089924; doi:10.1038/s41593-023-01284-w), 2023-03-30
Supplement: 41593_2023_1284_MOESM1_ESM.pdf [file 41593_2023_1284_MOESM1_ESM.pdf]

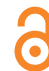

---

# Norepinephrine links astrocytic activity to regulation of cortical state

---

In the format provided by the authors and unedited

**Supplementary Tables:**

**Supplementary Table 1: Statistics for Fig. 1d**

| Bin X | Bin Y | Lower bound | Difference | Upper bound | p-value  | Bin # | # samples |
|-------|-------|-------------|------------|-------------|----------|-------|-----------|
|       |       |             |            |             | 1.00E+0  |       |           |
| 1     | 2     | -240.15     | -35.43     | 169.3       | 0        | 1     | 249       |
| 1     | 3     | -295.35     | -90.42     | 114.5       | 9.29E-01 | 2     | 604       |
| 1     | 4     | -399.03     | -184.07    | 30.89       | 1.70E-01 | 3     | 600       |
| 1     | 5     | -551.53     | -324.93    | -98.33      | 2.45E-04 | 4     | 447       |
| 1     | 6     | -810.7      | -569.21    | -327.71     | 1.79E-07 | 5     | 341       |
| 1     | 7     | -1223.7     | -965.97    | -708.21     | 1.79E-07 | 6     | 258       |
| 1     | 8     | -1464.6     | -1181.2    | -897.87     | 1.79E-07 | 7     | 201       |
| 1     | 9     | -1709.1     | -1372      | -1034.8     | 1.79E-07 | 8     | 146       |
| 1     | 10    | -1955.5     | -1502.1    | -1048.6     | 1.79E-07 | 9     | 88        |
| 2     | 3     | -211.68     | -55        | 101.69      | 9.84E-01 | 10    | 42        |
| 2     | 4     | -318.25     | -148.64    | 20.96       | 1.46E-01 |       |           |
| 2     | 5     | -473.63     | -289.5     | -105.37     | 2.88E-05 |       |           |
| 2     | 6     | -735.96     | -533.78    | -331.6      | 1.79E-07 |       |           |
| 2     | 7     | -1151.9     | -930.54    | -709.19     | 1.79E-07 |       |           |
| 2     | 8     | -1396.5     | -1145.8    | -895.1      | 1.79E-07 |       |           |
| 2     | 9     | -1646.7     | -1336.5    | -1026.4     | 1.79E-07 |       |           |
| 2     | 10    | -1900.4     | -1466.6    | -1032.8     | 1.79E-07 |       |           |
| 3     | 4     | -263.49     | -93.64     | 76.2        | 7.70E-01 |       |           |
| 3     | 5     | -418.86     | -234.5     | -50.15      | 2.31E-03 |       |           |
| 3     | 6     | -681.16     | -478.78    | -276.4      | 1.79E-07 |       |           |
| 3     | 7     | -1097.1     | -875.55    | -654.01     | 1.79E-07 |       |           |
| 3     | 8     | -1341.7     | -1090.8    | -839.94     | 1.79E-07 |       |           |
| 3     | 9     | -1591.8     | -1281.5    | -971.23     | 1.79E-07 |       |           |
| 3     | 10    | -1845.5     | -1411.6    | -977.75     | 1.79E-07 |       |           |
| 4     | 5     | -336.31     | -140.86    | 54.59       | 4.02E-01 |       |           |
| 4     | 6     | -597.68     | -385.14    | -172.6      | 5.36E-07 |       |           |
| 4     | 7     | -1012.8     | -781.9     | -551.04     | 1.79E-07 |       |           |
| 4     | 8     | -1256.3     | -997.15    | -738.03     | 1.79E-07 |       |           |
| 4     | 9     | -1504.9     | -1187.9    | -870.87     | 1.79E-07 |       |           |
| 4     | 10    | -1756.7     | -1318      | -879.27     | 1.79E-07 |       |           |
| 5     | 6     | -468.58     | -244.28    | -19.97      | 2.03E-02 |       |           |
| 5     | 7     | -882.77     | -641.04    | -399.31     | 1.79E-07 |       |           |
| 5     | 8     | -1125.1     | -856.29    | -587.44     | 1.79E-07 |       |           |
| 5     | 9     | -1372.1     | -1047      | -722        | 1.79E-07 |       |           |
| 5     | 10    | -1621.7     | -1177.1    | -732.59     | 1.79E-07 |       |           |
| 6     | 7     | -652.51     | -396.76    | -141.02     | 4.03E-05 |       |           |
| 6     | 8     | -893.54     | -612.02    | -330.49     | 1.79E-07 |       |           |
| 6     | 9     | -1138.3     | -802.75    | -467.17     | 1.79E-07 |       |           |
| 6     | 10    | -1385.2     | -932.85    | -480.54     | 1.79E-07 |       |           |
| 7     | 8     | -510.85     | -215.25    | 80.35       | 3.86E-01 |       |           |

|   |    |         |         |        |          |
|---|----|---------|---------|--------|----------|
| 7 | 9  | -753.46 | -405.99 | -58.52 | 8.32E-03 |
| 7 | 10 | -997.29 | -536.09 | -74.89 | 8.92E-03 |
| 8 | 9  | -557.59 | -190.74 | 176.12 | 8.26E-01 |
| 8 | 10 | -796.81 | -320.84 | 155.14 | 5.04E-01 |
| 9 | 10 | -639.92 | -130.1  | 379.72 | 9.99E-01 |

**Supplementary Table 2: Statistics for Fig. 2h**

| Std<br>Threshold<br>X | Std<br>Threshold<br>Y | Lower<br>bound | Difference | Upper<br>bound | p-value  | Std<br>Threshold | #<br>samples |
|-----------------------|-----------------------|----------------|------------|----------------|----------|------------------|--------------|
| 0.5                   | 1                     | -2386.5        | -2140.6    | -1894.8        | 2.07E-08 | 0.5              | 5551         |
| 0.5                   | 1.5                   | -3965.4        | -3671.2    | -3376.9        | 2.07E-08 | 1                | 3441         |
| 0.5                   | 2                     | -4833.4        | -4465.9    | -4098.4        | 2.07E-08 | 1.5              | 2023         |
| 0.5                   | 2.5                   | -5737.5        | -5256.7    | -4775.8        | 2.07E-08 | 2                | 1147         |
| 0.5                   | 3                     | -7316.4        | -6926.3    | -6536.2        | 2.07E-08 | 2.5              | 617          |
| 1                     | 1.5                   | -1848          | -1530.5    | -1213.1        | 2.07E-08 | 3                | 995          |
| 1                     | 2                     | -2711.6        | -2325.3    | -1938.9        | 2.07E-08 |                  |              |
| 1                     | 2.5                   | -3611.4        | -3116      | -2620.6        | 2.07E-08 |                  |              |
| 1                     | 3                     | -5193.5        | -4785.7    | -4377.8        | 2.07E-08 |                  |              |
| 1.5                   | 2                     | -1213.6        | -794.74    | -375.91        | 9.70E-07 |                  |              |
| 1.5                   | 2.5                   | -2106.6        | -1585.5    | -1064.4        | 2.07E-08 |                  |              |
| 1.5                   | 3                     | -3693.9        | -3255.1    | -2816.4        | 2.07E-08 |                  |              |
| 2                     | 2.5                   | -1356.5        | -790.76    | -225.03        | 9.61E-04 |                  |              |
| 2                     | 3                     | -2951.3        | -2460.4    | -1969.5        | 2.07E-08 |                  |              |
| 2.5                   | 3                     | -2250.3        | -1669.6    | -1089          | 2.07E-08 |                  |              |

### Supplementary Table 3: Statistics for Fig. 2j

*Prolonged*

| <u>Std. Threshold</u> | <u># samples</u> | <u>p-value</u> |
|-----------------------|------------------|----------------|
| 0.5                   | 5551             | 7.40E-03       |
| 1                     | 3441             | 3.45E-01       |
| 1.5                   | 2023             | 5.21E-01       |
| 2                     | 1147             | 4.52E-02       |
| 2.5                   | 617              | 3.14E-03       |
| 3                     | 995              | 6.38E-11       |

*Immediate*

| <u>Std. Threshold</u> | <u># samples</u> | <u>p-value</u> |
|-----------------------|------------------|----------------|
| 0.5                   | 5551             | 9.09E-01       |
| 1                     | 3441             | 4.53E-06       |
| 1.5                   | 2023             | 6.30E-03       |
| 2                     | 1147             | 5.70E-06       |
| 2.5                   | 617              | 6.46E-08       |
| 3                     | 995              | 2.25E-06       |

**Supplementary Table 4: Statistics for Fig. 4d**

| Condition X | Condition Y | Lower bound | Difference | Upper bound | p-value  | Condition | # samples |
|-------------|-------------|-------------|------------|-------------|----------|-----------|-----------|
| Sb          | St          | -55.885     | 43.189     | 142.26      | 8.16E-01 | Sb        | 213       |
| Sb          | CNO1b       | -314.17     | -221.1     | -128.02     | 2.08E-08 | St        | 129       |
| Sb          | CNO1t       | -226.4      | -142.04    | -57.68      | 2.36E-05 | CNO1b     | 159       |
| Sb          | CNO5b       | -172.33     | -88.142    | -3.9574     | 3.39E-02 | CNO1t     | 231       |
| Sb          | CNO5t       | -218.46     | -115.4     | -12.349     | 1.78E-02 | CNO5b     | 233       |
| St          | CNO1b       | -369.51     | -264.28    | -159.06     | 2.07E-08 | CNO5t     | 114       |
| St          | CNO1t       | -282.83     | -185.23    | -87.62      | 9.68E-07 |           |           |
| St          | CNO5b       | -228.79     | -131.33    | -33.873     | 1.71E-03 |           |           |
| St          | CNO5t       | -272.74     | -158.59    | -44.438     | 1.06E-03 |           |           |
| CNO1b       | CNO1t       | -12.451     | 79.057     | 170.57      | 1.36E-01 |           |           |
| CNO1b       | CNO5b       | 41.606      | 132.95     | 224.3       | 4.81E-04 |           |           |
| CNO1b       | CNO5t       | -3.2907     | 105.69     | 214.68      | 6.34E-02 |           |           |
| CNO1t       | CNO5b       | -28.556     | 53.897     | 136.35      | 4.25E-01 |           |           |
| CNO1t       | CNO5t       | -75.008     | 26.636     | 128.28      | 9.76E-01 |           |           |
| CNO5b       | CNO5t       | -128.76     | -27.261    | 74.239      | 9.73E-01 |           |           |

**Legend**

Sb: Saline – Baseline period

St: Saline – Treatment period

CNO1b: 1mg/Kg CNO – Baseline period

CNO1t: 1mg/Kg CNO – Treatment period

CNO5b: 5mg/Kg CNO – Baseline period

CNO5t: 5mg/Kg CNO – Treatment period

**Supplementary Table 5: Statistics for Fig. 4f**

| Condition X | Condition Y | Lower bound | Difference | Upper bound | p-value  | Condition | # samples |
|-------------|-------------|-------------|------------|-------------|----------|-----------|-----------|
| Sb          | St          | -18.115     | 99.152     | 216.42      | 1.53E-01 | Sb        | 126       |
| Sb          | CNO1b       | -316.41     | -191.86    | -67.3       | 1.65E-04 | St        | 264       |
| Sb          | CNO1t       | -216.34     | -98.561    | 19.221      | 1.62E-01 | CNO1b     | 189       |
| Sb          | CNO5b       | -180.52     | -63.747    | 53.029      | 6.28E-01 | CNO1t     | 257       |
| Sb          | CNO5t       | -403.61     | -281.46    | -159.31     | 2.14E-08 | CNO5b     | 271       |
| St          | CNO1b       | -394.2      | -291.01    | -187.82     | 2.07E-08 | CNO5t     | 209       |
| St          | CNO1t       | -292.62     | -197.71    | -102.81     | 6.33E-08 |           |           |
| St          | CNO5b       | -256.55     | -162.9     | -69.247     | 1.06E-05 |           |           |
| St          | CNO5t       | -480.88     | -380.61    | -280.34     | 2.07E-08 |           |           |
| CNO1b       | CNO1t       | -10.481     | 93.296     | 197.07      | 1.07E-01 |           |           |
| CNO1b       | CNO5b       | 25.475      | 128.11     | 230.74      | 5.04E-03 |           |           |
| CNO1b       | CNO5t       | -198.31     | -89.601    | 19.108      | 1.75E-01 |           |           |
| CNO1t       | CNO5b       | -59.483     | 34.814     | 129.11      | 9.00E-01 |           |           |
| CNO1t       | CNO5t       | -283.77     | -182.9     | -82.022     | 3.56E-06 |           |           |
| CNO5b       | CNO5t       | -317.41     | -217.71    | -118.01     | 2.77E-08 |           |           |

Legend

Sb: Saline – Baseline period

St: Saline – Treatment period

CNO1b: 1mg/Kg CNO – Baseline period

CNO1t: 1mg/Kg CNO – Treatment period

CNO5b: 5mg/Kg CNO – Baseline period
